# Supplementary material for: Fatty acid oxidation organizes mitochondrial supercomplexes to sustain astrocytic ROS and cognition
Source: PubMed Central journal article supplement (PMC10447235; doi:10.1038/s42255-023-00835-6), 2023-07-17

Supplementary Fig. 1d

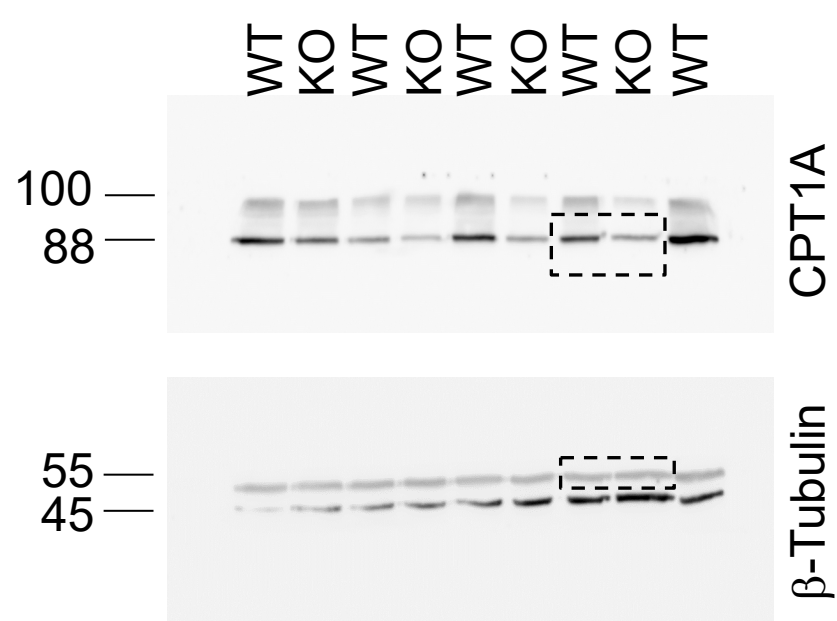

Supplementary Fig. 2b

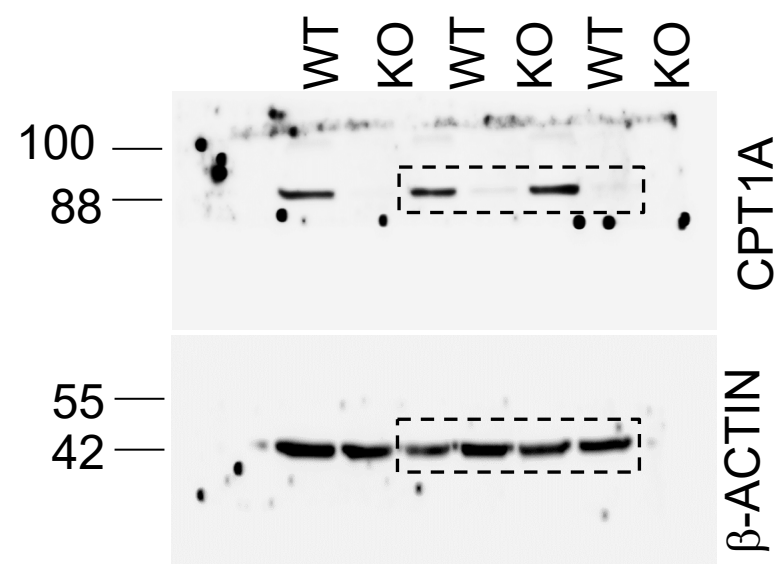

Supplementary Fig. 2g

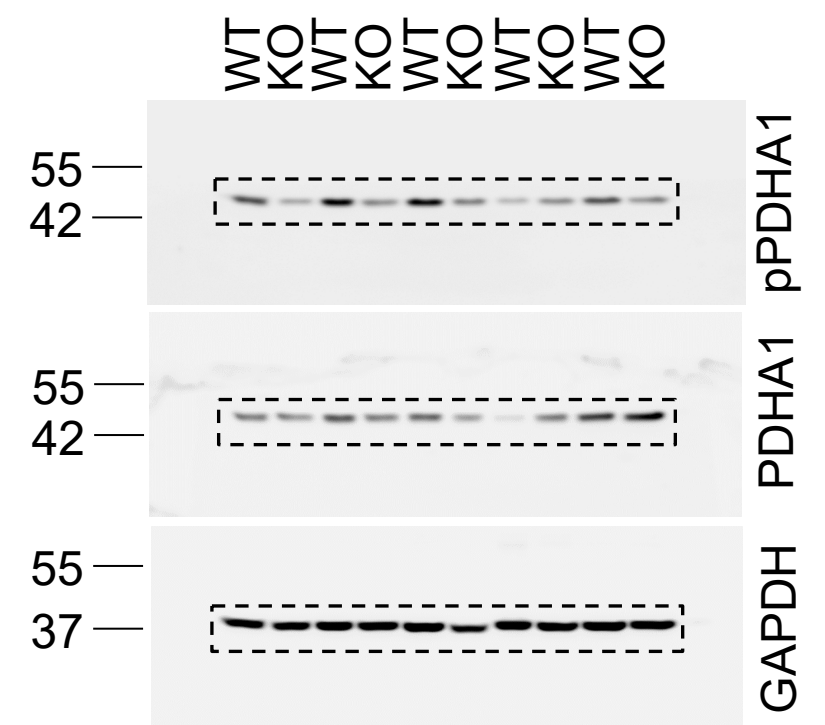

Supplementary Fig. 2c

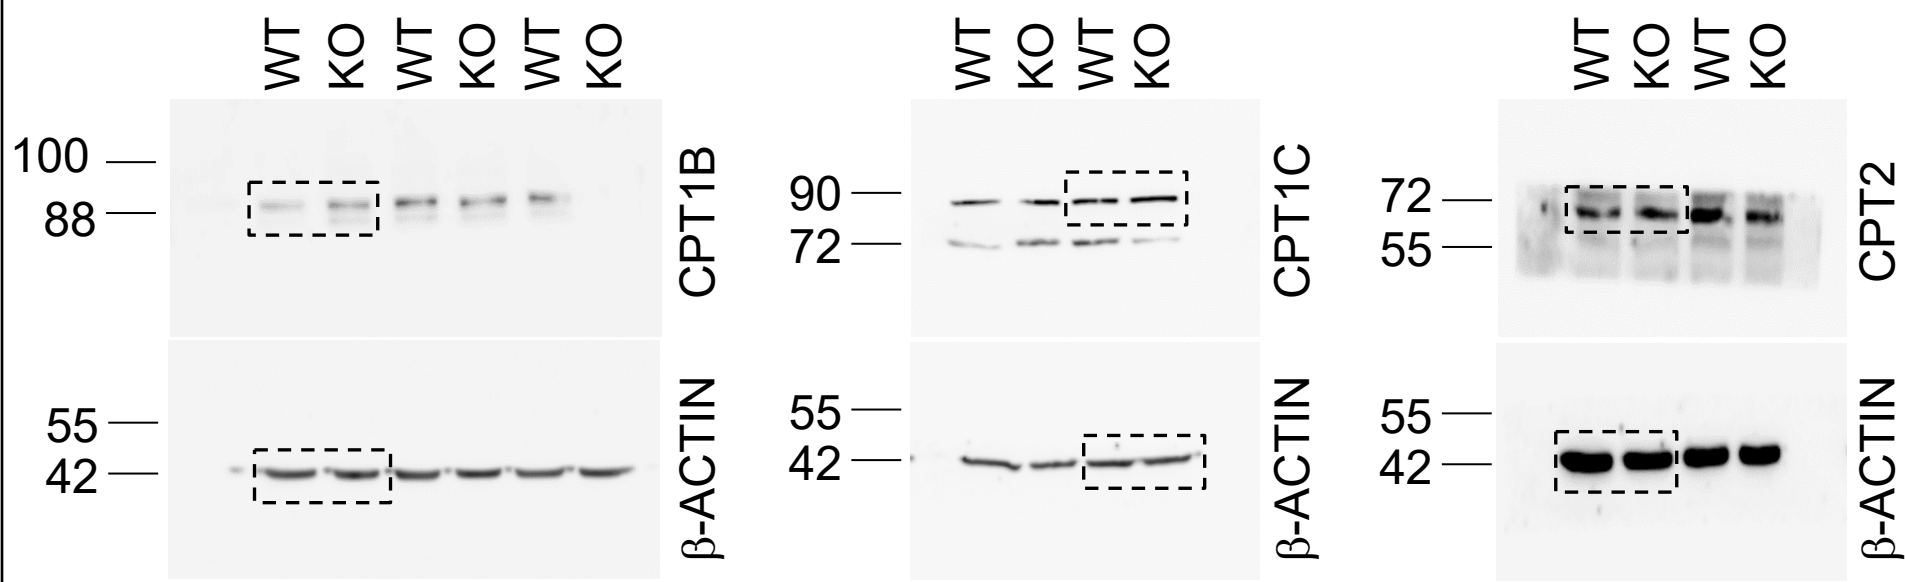

Supplementary Fig. 3b

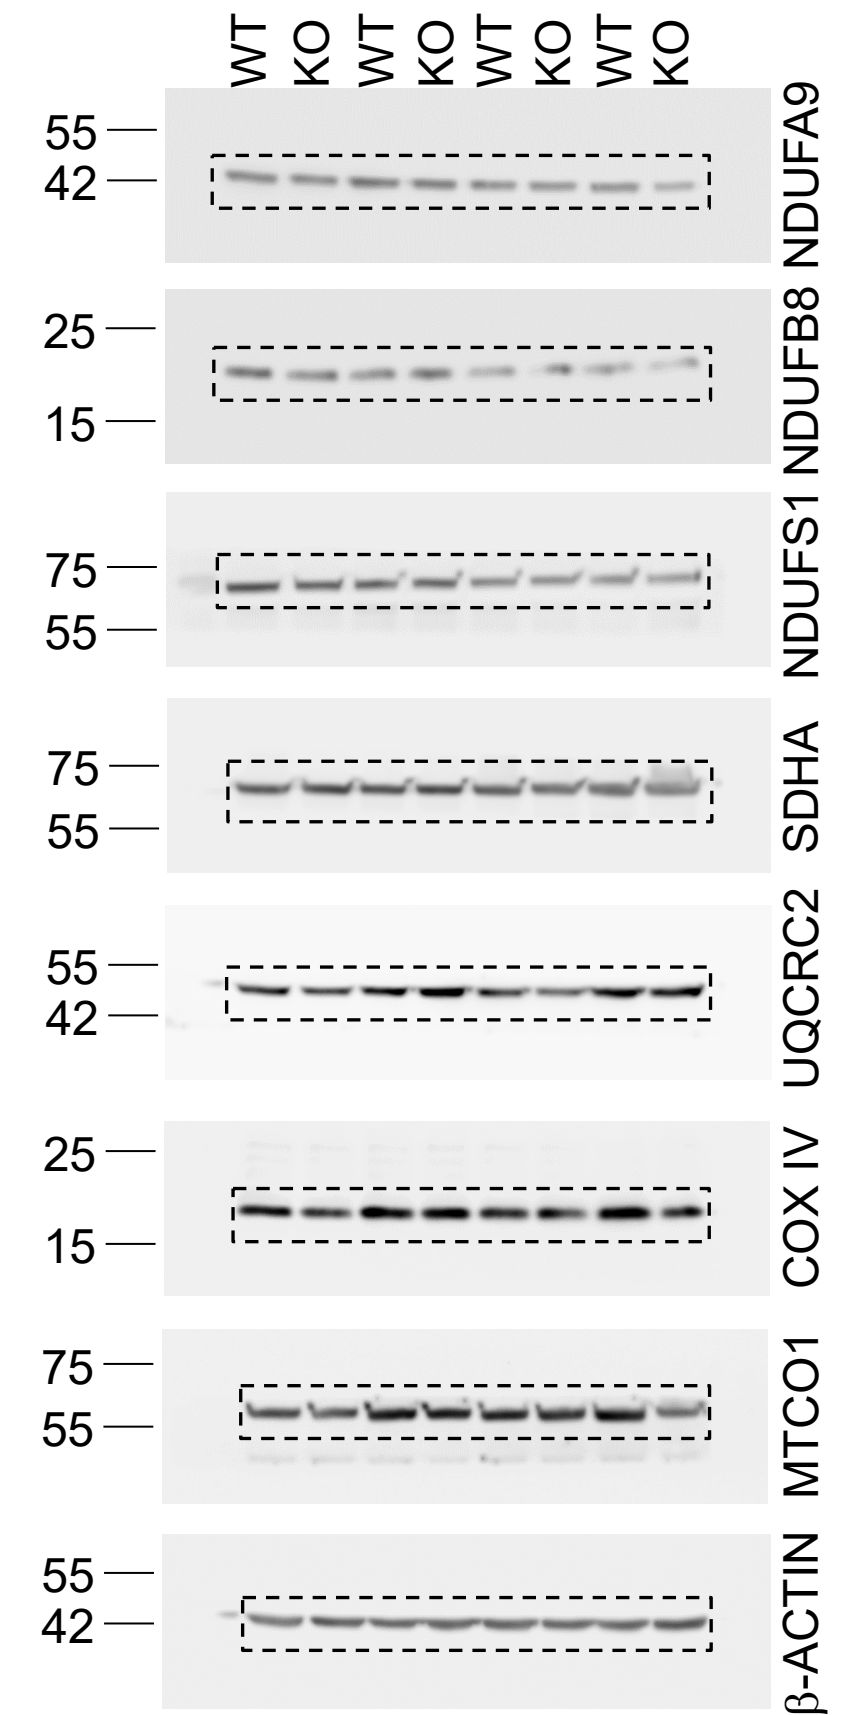

Supplementary Fig. 2i

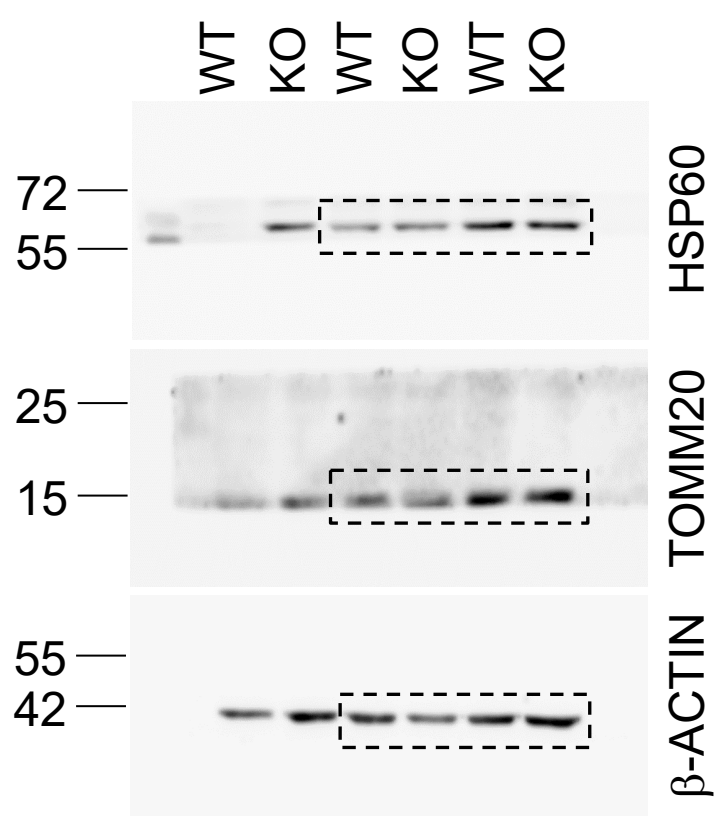

Supplementary Fig. 3a

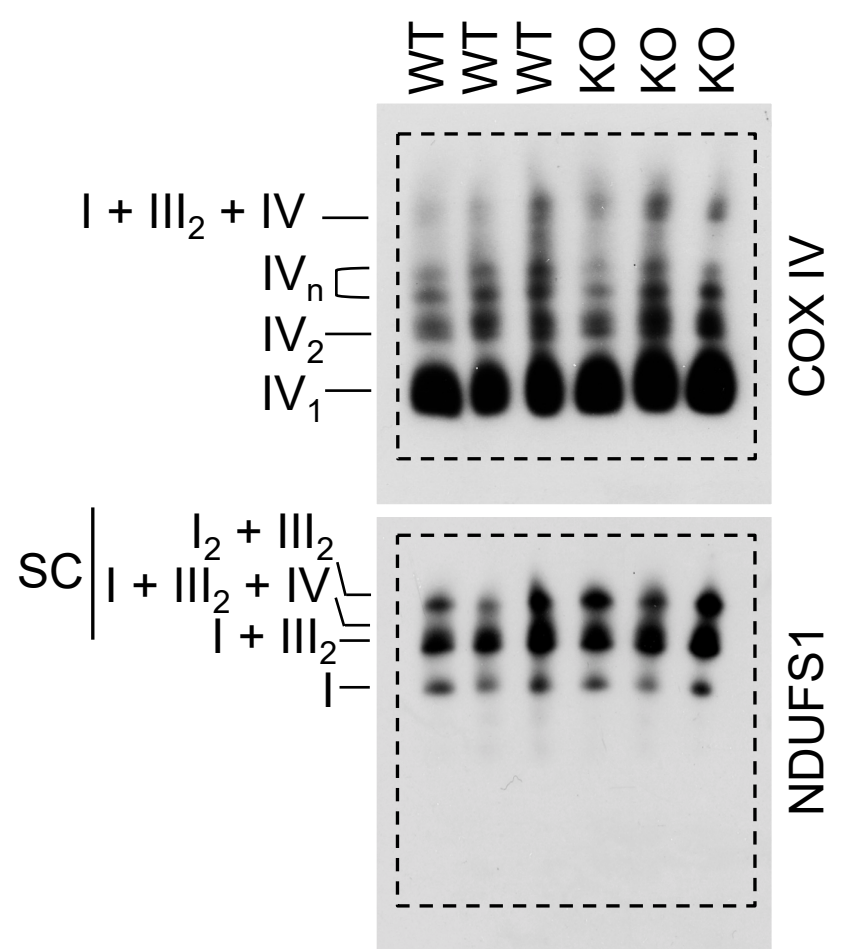

Supplementary Fig. 3d

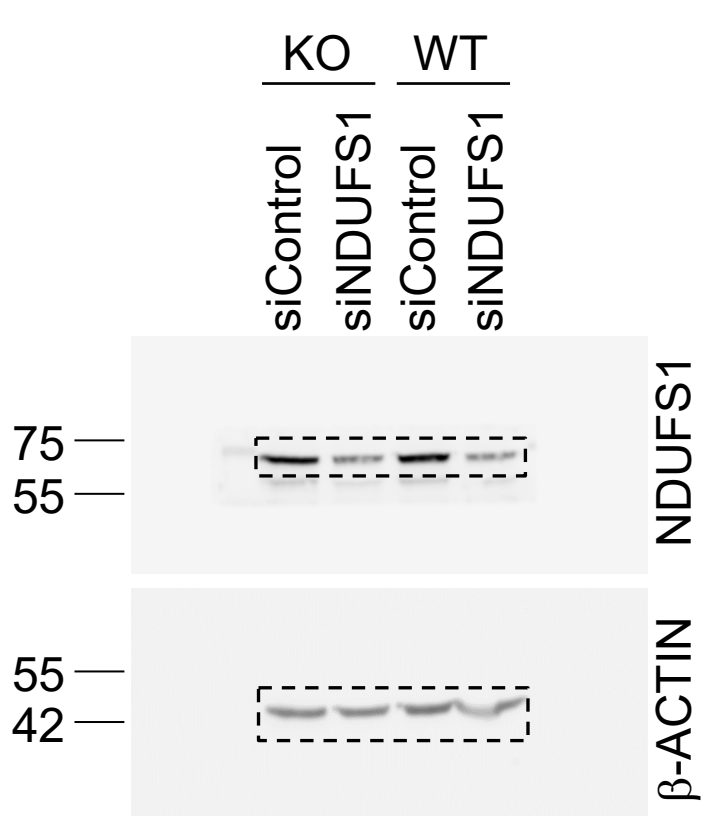

Supplementary Fig. 3e

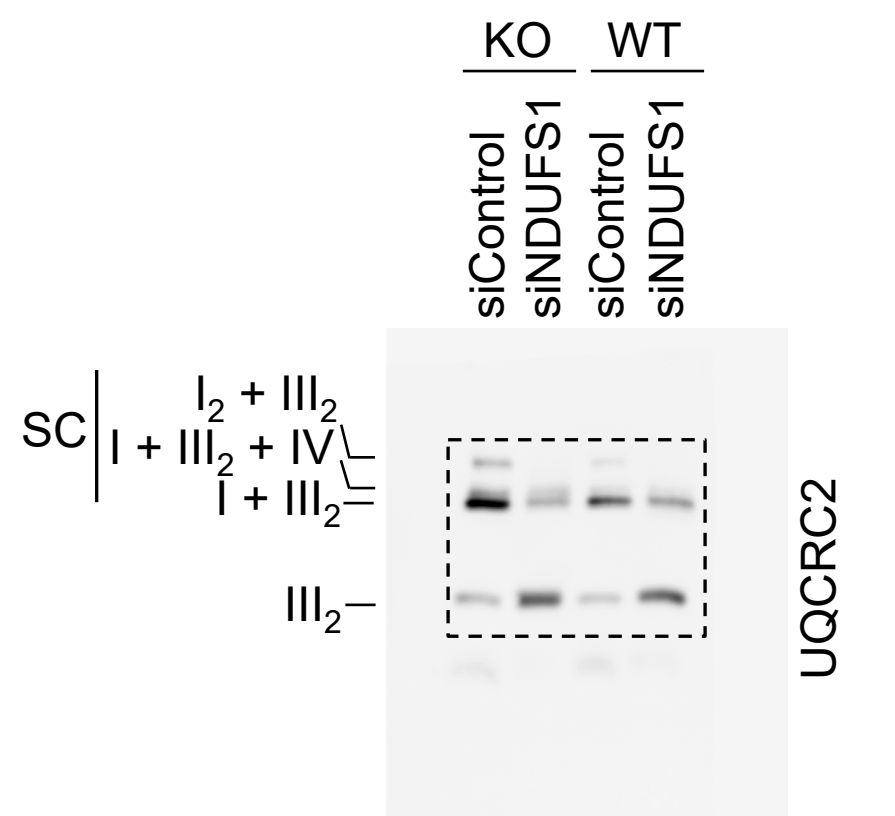

Supplementary Fig. 4b

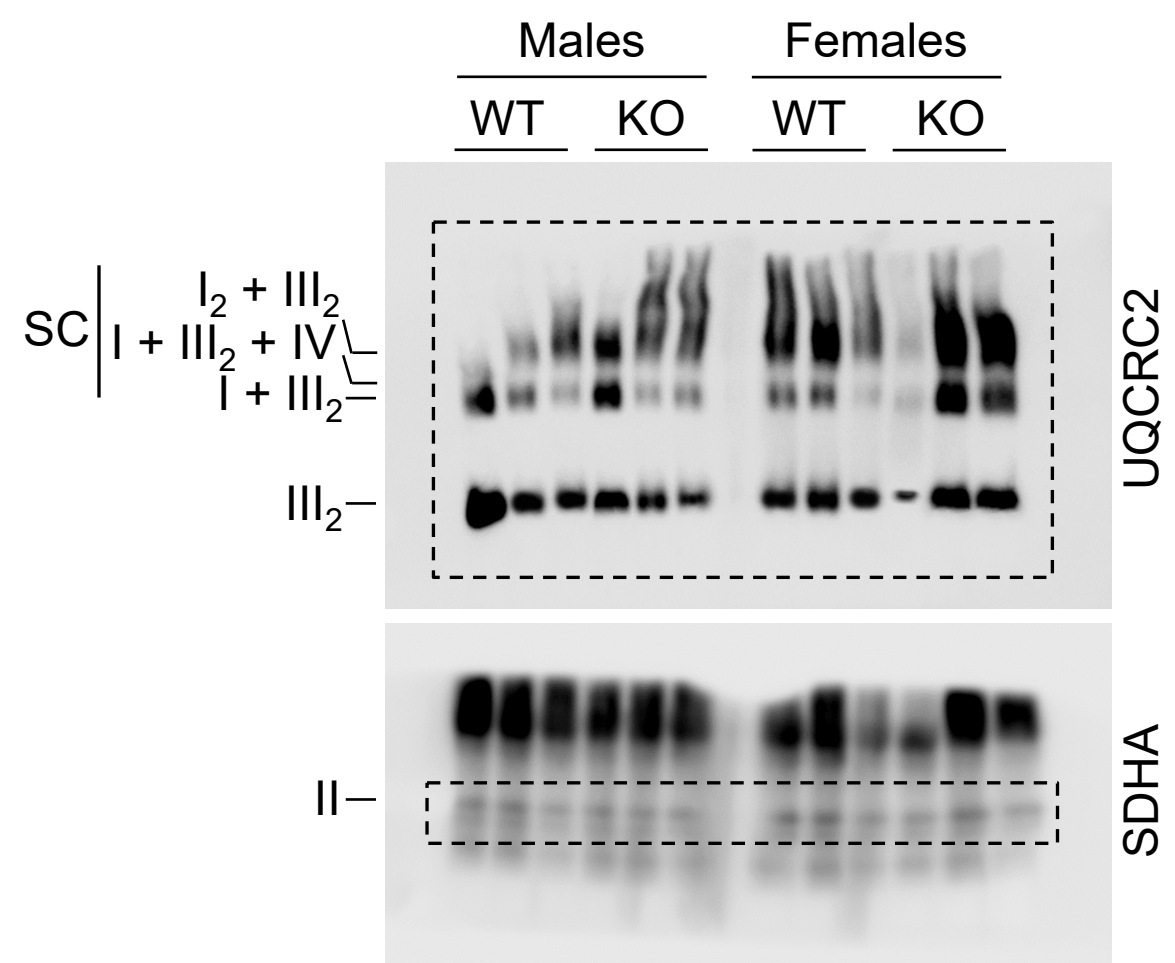

Supplementary Fig. 4a

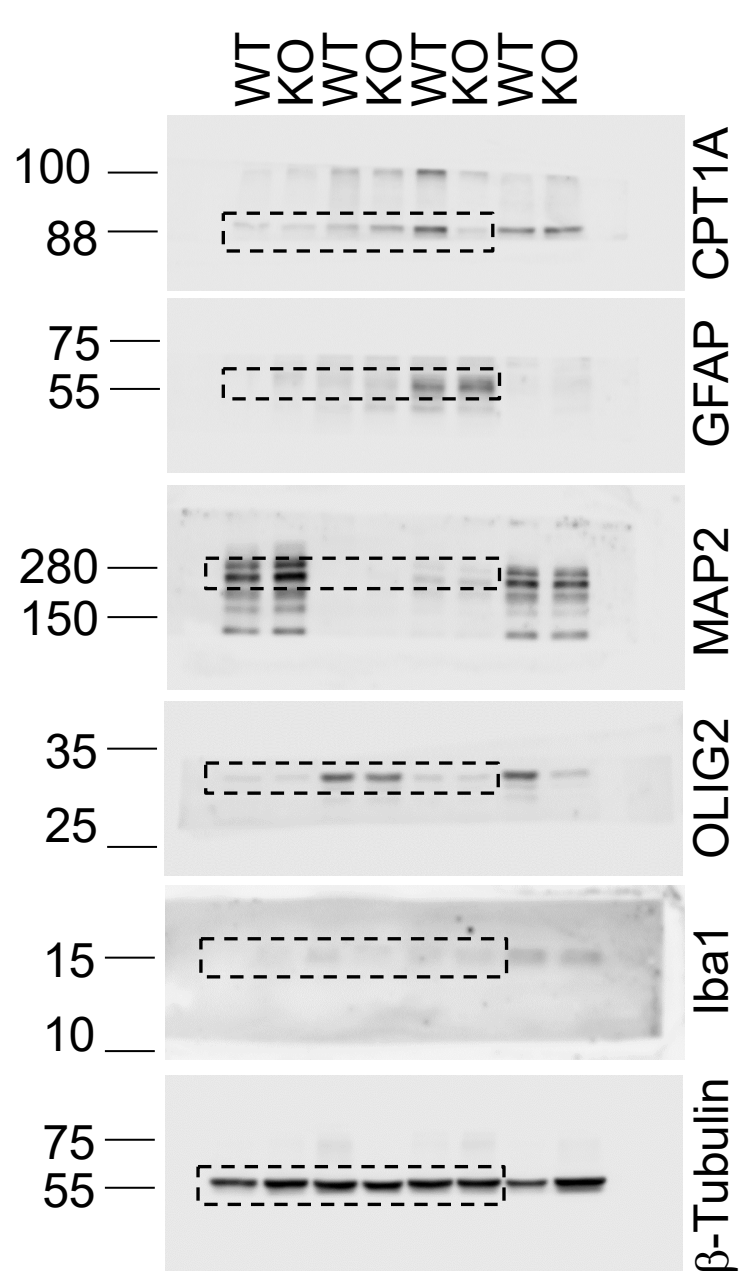

Supplementary Fig. 4c

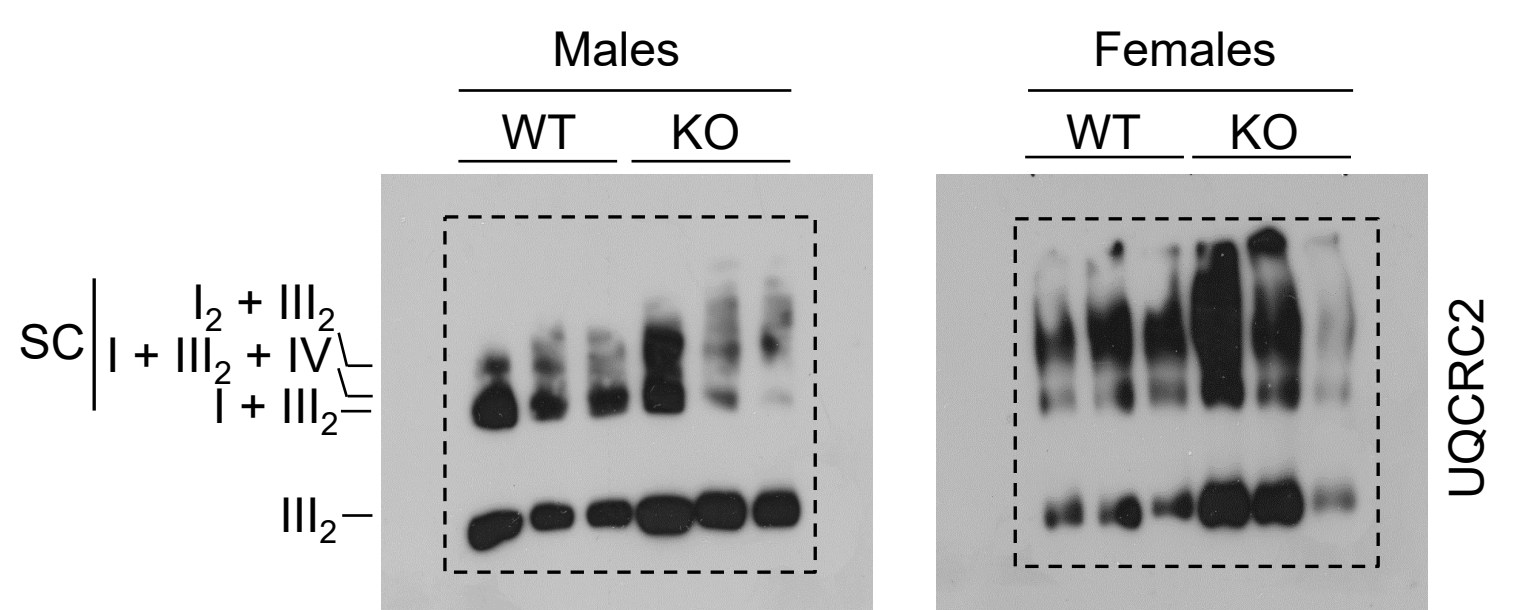

Supplement: 42255_2023_835_MOESM5_ESM.pdf [file 42255_2023_835_MOESM5_ESM.pdf]
