# Supplementary material for: Fatty acid oxidation organizes mitochondrial supercomplexes to sustain astrocytic ROS and cognition
Source: PubMed Central journal article supplement (PMC10447235; doi:10.1038/s42255-023-00835-6), 2023-07-17

**Fig. 1b**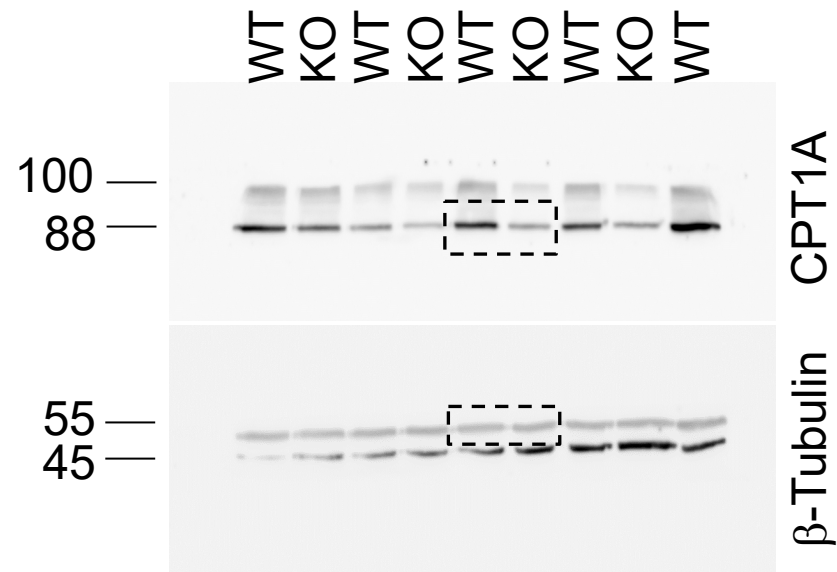**Fig. 1c**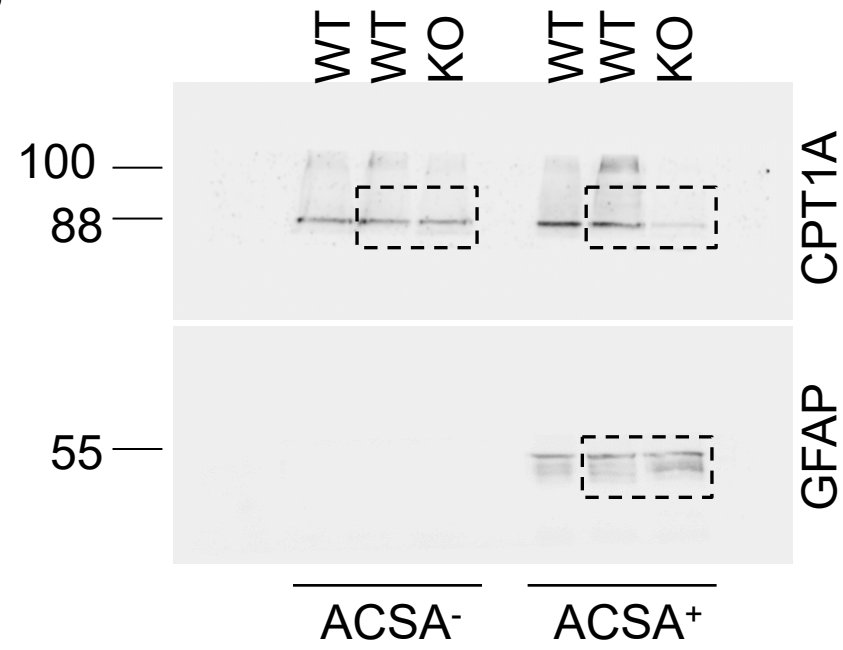**Fig. 2b**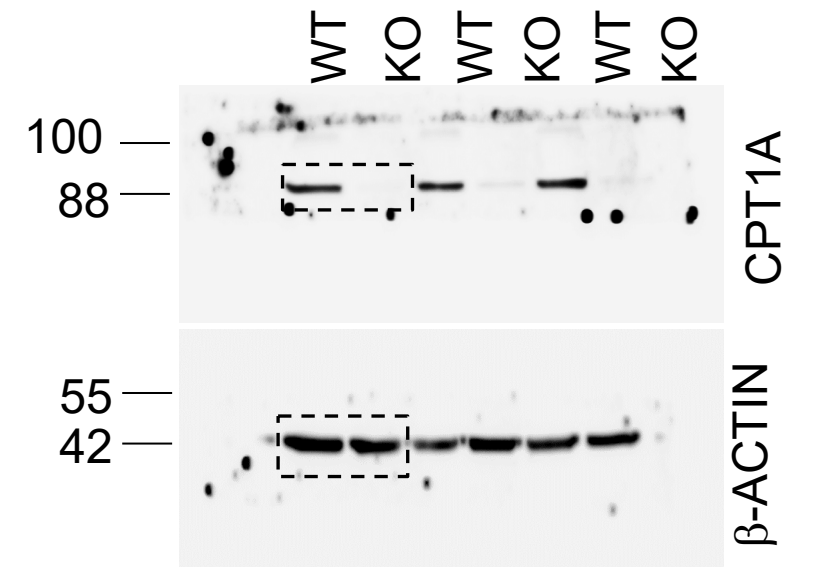**Fig. 3a**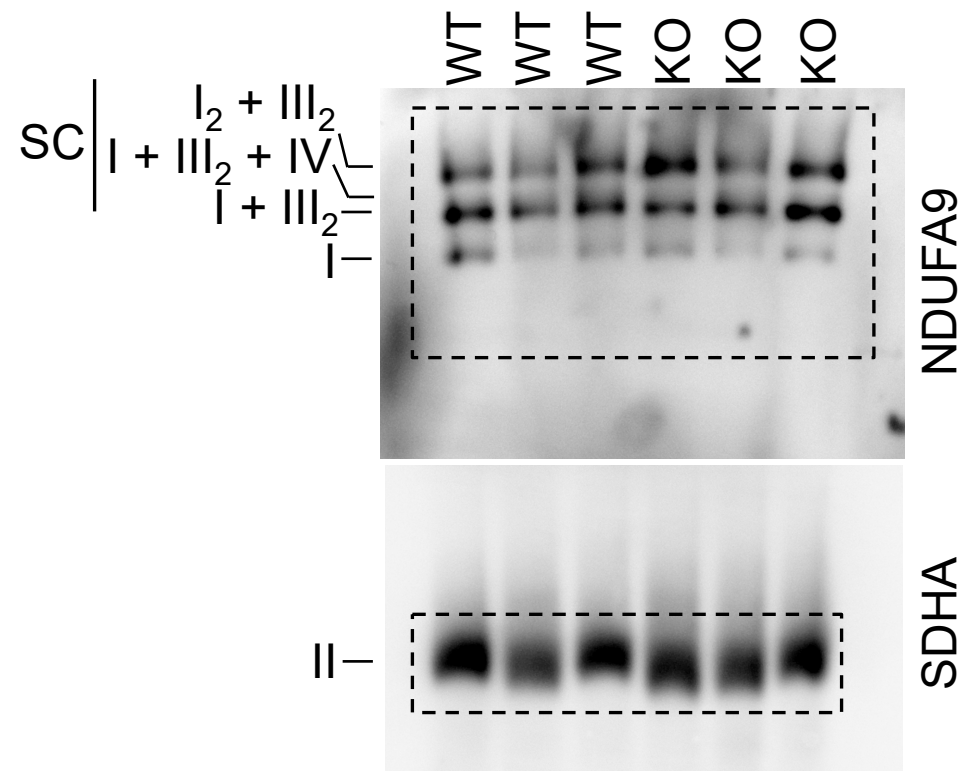**Fig. 3b**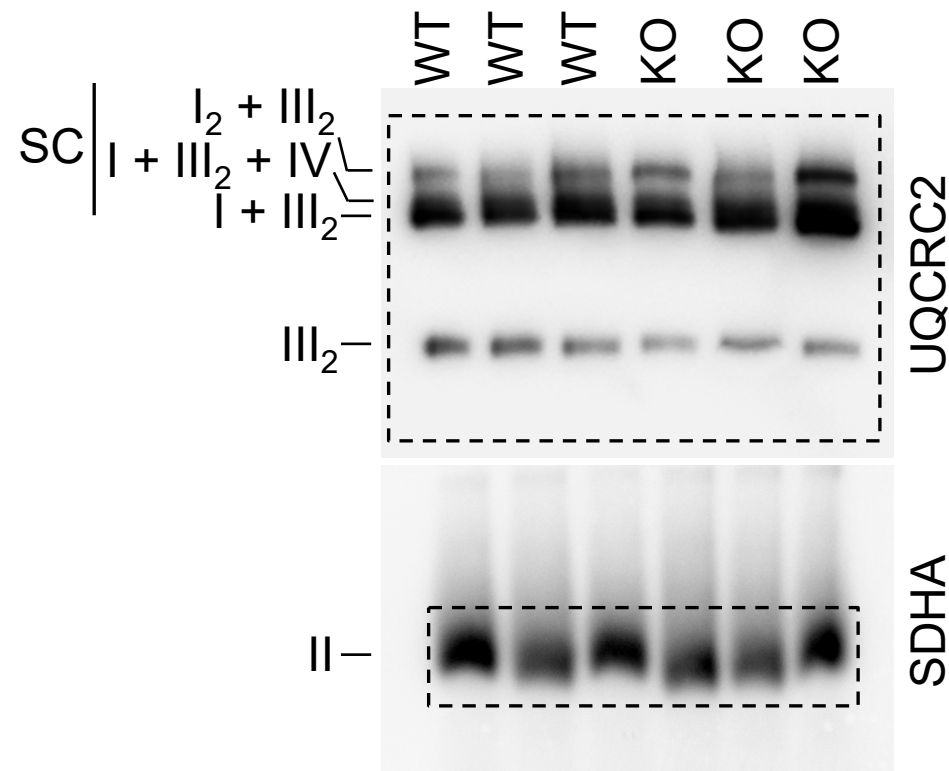

Supplement: 42255_2023_835_MOESM9_ESM.pdf [file 42255_2023_835_MOESM9_ESM.pdf]
